# Supplementary material
Source: HighWire-hosted journal article supplement (https://www.ajnr.org/highwire/filestream/52241/field_highwire_adjunct_files/0/2715_table.pdf)
Supplement: 2715_table.pdf [file 2715_table.pdf]

**On-line Table: Patient clinical data and characteristics**

| Pat. No | Age (yrs), Sex | Diagnosis                                 | Symptoms                                                    | Intervention                                                                    | FPD-CBV Lesion Depictable                                                                                             |
|---------|----------------|-------------------------------------------|-------------------------------------------------------------|---------------------------------------------------------------------------------|-----------------------------------------------------------------------------------------------------------------------|
| 1       | 53, F          | ICA occlusion                             | Acute stroke                                                | Mechanical recanalization                                                       | Pre-recanalization*: MCA and ACA territory left<br>Post-recanalization*: CBV normalization                            |
| 2       | 73, F          | Aneurysmal SAH                            | Subacute stroke                                             | PTA/stenting ICA                                                                | Pre-recanalization*: none<br>Post-recanalization*: none                                                               |
| 3       | 50, F          | Aneurysmal SAH                            | Headache                                                    | Coiling and stent-remodeling, peri-interventional thrombus formation            | Postinterventional control of stent patency <sup>+</sup> : none                                                       |
| 4       | 77, M          | High-grade ICA stenosis, left             | Acute stroke                                                | PTA/stenting ICA                                                                | Pre-recanalization <sup>+</sup> : none<br>Post-recanalization <sup>+</sup> : failed                                   |
| 5       | 62, M          | Vasculitis/multiple intracranial stenosis | Previous stroke                                             | Diagnostic angiography                                                          | MCA territory, right <sup>+</sup>                                                                                     |
| 6       | 86, M          | ICA occlusion, left                       | Acute stroke                                                | Recanalization attempt, failed                                                  | None, technically failed <sup>+</sup>                                                                                 |
| 7       | 40, F          | Distal M1 stenosis, left                  | Subacute stroke                                             | Diagnostic angiography                                                          | None <sup>+</sup>                                                                                                     |
| 8       | 42, F          | Mycotic aneurysm                          | Headache                                                    | Embolization with histoacryl                                                    | None <sup>+</sup>                                                                                                     |
| 9       | 68, F          | Aneurysmal SAH                            | Headache                                                    | Coiling                                                                         | Preinterventional <sup>+</sup> : none                                                                                 |
| 10      | 79, M          | M3 occlusion, right                       | Acute stroke                                                | IA lysis, failed                                                                | Technically failed due to motion artifacts*<br>Postinterventional <sup>+</sup> : PICA territory, right                |
| 11      | 47, F          | Dissection/SAH                            | Headache, nausea                                            | Embolization with histoacryl                                                    | None <sup>+</sup>                                                                                                     |
| 12      | 69, F          | Suspicious for SAH                        | Stroke-like symptoms                                        | Diagnostic angiography                                                          | None <sup>+</sup>                                                                                                     |
| 13      | 75, F          | M1 occlusion, left                        | Acute stroke                                                | Mechanical and IA lysis. M3 branch perforation and embolization with histoacryl | Postinterventional <sup>+</sup> : right frontal operculum                                                             |
| 14      | 46, F          | M1 stenosis, right                        | Subacute stroke-like symptoms                               | Diagnostic angiography                                                          | None <sup>+</sup>                                                                                                     |
| 15      | 63, M          | Aneurysmal SAH                            | Headache, seizure                                           | Embolization with histoacryl                                                    | Preinterventional <sup>+</sup> : none<br>Postinterventional <sup>+</sup> : none                                       |
| 16      | 64, M          | Dissection/SAH                            | Sudden loss of consciousness, cardiopulmonary resuscitation | Stenting                                                                        | Postinterventional <sup>+</sup> : none                                                                                |
| 17      | 45, F          | Sinus thrombosis                          | Headache, motor aphasia                                     | Recanalization using aspiration                                                 | Preinterventional <sup>+</sup> : temporal lobe left<br>Postinterventional <sup>+</sup> : temporal lobe left unchanged |
| 18      | 18, M          | Aneurysmal SAH                            | Impaired consciousness, new aphasia due to vasospasm        | Spasmolysis and PTA                                                             | Postinterventional <sup>+</sup> : none                                                                                |

\* indicates intra-arterial injection protocol; +, intra-venous injection protocol; ICA = internal carotid artery; PTA = percutaneous transluminal angioplasty; UA = ultra-arteriol. The patients are listed according to the chronological order of their examinations. Notice that technical failures decreased with time, probably representing a learning curve effect. Thus, no technical failures occurred since patient 10.
